# Supplementary material for: Occurrence and Characterization of Wheat Streak Mosaic Virus Found in Mono- and Mixed Infection with High Plains Wheat Mosaic Virus in Winter Wheat in Ukraine
Source: MDPI journal article supplement (doi:10.3390/v14061220), 2022-06-03
Supplement: s1 [file s1]

**Table S1.** List of sequences of Ukrainian isolates of WSMV and HPWMoV recovered and analyzed in this work.

| GenBank<br>Accession<br>number | Virus  | Gene          | Isolate name     | Year of<br>sampling | Region of<br>sampling |
|--------------------------------|--------|---------------|------------------|---------------------|-----------------------|
| MK167470                       | WSMV   | Coat protein  | WSMV-UA-2017     | 2017                | Kyiv                  |
| OM927716                       | WSMV   | Coat protein  | UA-WSMV-CP-ZP-18 | 2018                | Zaporizhia            |
| OM927717                       | WSMV   | Coat protein  | UA-WSMV-CP-KH-18 | 2018                | Kharkiv               |
| OM927718                       | WSMV   | Coat protein  | UA-WSMV-CP-DN-19 | 2019                | Dnipropetrovsk        |
| OM927719                       | WSMV   | Coat protein  | UA-WSMV-CP-ZP-21 | 2021                | Zaporizhia            |
| MK790262                       | HPWMoV | Nucleoprotein | UA-HPWMoV-DP     | 2018                | Dnipropetrovsk        |
| MK790263                       | HPWMoV | Nucleoprotein | UA-HPWMoV-ZP     | 2018                | Zaporizhia            |
| MK156130                       | HPWMoV | Nucleoprotein | UA-HPWMoV-1      | 2018                | Vinnytsia (maize)     |

**Table S2.** Nucleotide and amino acid identity of WSMV isolates described in this research (shown in bold) with other WSMV isolates

| GenBank<br>Accession<br>number | Isolate name      | Country of origin     | Nucleic acid identity, % |                  |                  |                  |                  | Amino acid identity, % |                  |                  |                  |                  |
|--------------------------------|-------------------|-----------------------|--------------------------|------------------|------------------|------------------|------------------|------------------------|------------------|------------------|------------------|------------------|
|                                |                   |                       | WSMV-UA-2017             | UA-WSMV-CP-ZP-18 | UA-WSMV-CP-ZP-21 | UA-WSMV-CP-DN-19 | UA-WSMV-CP-KH-18 | WSMV-UA-2017           | UA-WSMV-CP-ZP-18 | UA-WSMV-CP-ZP-21 | UA-WSMV-CP-DN-19 | UA-WSMV-CP-KH-18 |
| MK167470                       | WSMV-UA-2017      | Ukraine               | -                        |                  |                  |                  |                  | -                      |                  |                  |                  |                  |
| OM927716                       | UA-WSMV-CP-ZP-18  | Ukraine               | 97,4                     | -                |                  |                  |                  | 97,8                   | -                |                  |                  |                  |
| OM927719                       | UA-WSMV-CP-ZP-21  | Ukraine               | 98,3                     | 98               | -                |                  |                  | 98,4                   | 98,3             | -                |                  |                  |
| OM927718                       | UA-WSMV-CP-DN-19  | Ukraine               | 98,7                     | 98,4             | 99,6             | -                |                  | 98,9                   | 98,9             | 99,5             | -                |                  |
| OM927717                       | UA-WSMV-CP-KH-18  | Ukraine               | 97,7                     | 97,8             | 98,7             | 99               | -                | 97,9                   | 98,9             | 98,4             | 98,9             | -                |
| MW072786.1                     | Z-Vas-Ukr-2020    | Ukraine               | 97,9                     | 98               | 98,8             | 99,2             | 98,7             | 98,4                   | 99,4             | 98,9             | 99,5             | 99,5             |
| MW072787.1                     | P-Ch-Vas-Ukr-2020 | Ukraine               | 97,3                     | 97,4             | 98,3             | 98,7             | 98,1             | 97,8                   | 98,3             | 97,8             | 98,4             | 98,4             |
| MH523356.1                     | Ukraine-Mal-18    | Ukraine               | 93,6                     | 93,7             | 94,7             | 95,1             | 94,5             | 92,6                   | 93,5             | 93,2             | 93,8             | 93,7             |
| MH523357.1                     | Ukraine-Ep-18     | Ukraine               | 90                       | 89,8             | 91,3             | 91,3             | 90,7             | 85,6                   | 86,4             | 87,5             | 86,9             | 86,9             |
| MZ202336.1                     | DSMZ_PV-0356      | Ukraine               | 97,9                     | 98               | 98,8             | 99,2             | 98,7             | 98,4                   | 99,4             | 98,9             | 99,5             | 99,5             |
| MW990168.1                     | KM19              | USA: Kingman Co_KS    | 96,5                     | 97               | 97,5             | 97,9             | 97,3             | 97,3                   | 98,3             | 97,9             | 98,4             | 98,4             |
| MW990182.1                     | GL20              | USA: Greeley Co_KS    | 89,9                     | 89,9             | 91               | 91,2             | 90,6             | 97,3                   | 98,3             | 97,9             | 98,4             | 98,4             |
| MT780567.1                     | HUUS9             | Hungary: Keszthely-US | 97,5                     | 97,6             | 98,5             | 98,8             | 98,3             | 98,4                   | 99,4             | 98,9             | 99,5             | 99,5             |
| MT780566.1                     | HUUS8             | Hungary: Keszthely-US | 97,3                     | 97,4             | 98,3             | 98,6             | 98,1             | 98,4                   | 99,4             | 98,9             | 99,5             | 99,5             |
| MT780565.1                     | HUUS7             | Hungary: Keszthely-US | 97,1                     | 97               | 97,9             | 98,3             | 97,7             | 97,3                   | 98,3             | 97,9             | 98,4             | 98,4             |
| MT780564.1                     | HUUS6             | Hungary: Keszthely-US | 96,9                     | 96,8             | 97,7             | 98,1             | 97,5             | 97,3                   | 98,3             | 97,9             | 98,4             | 98,4             |
| MT780563.1                     | HUUS5             | Hungary: Keszthely-US | 97,7                     | 97,8             | 98,7             | 99               | 98,5             | 98,4                   | 99,4             | 98,9             | 99,5             | 99,5             |
| MT780562.1                     | HUUS4             | Hungary: Keszthely-US | 97,3                     | 97,2             | 98,1             | 98,5             | 97,9             | 97,9                   | 98,9             | 98,4             | 98,9             | 98,9             |
| MT780560.1                     | HUUS2             | Hungary: Keszthely-US | 97,1                     | 97,2             | 98,1             | 98,5             | 97,9             | 98,4                   | 99,4             | 98,9             | 99,5             | 99,5             |
| MT780559.1                     | HUUS1             | Hungary: Keszthely-US | 97,1                     | 97,2             | 98,1             | 98,5             | 97,9             | 98,4                   | 99,4             | 98,9             | 99,5             | 99,5             |
| MT780558.1                     | HUBA8             | Hungary: Keszthely-BA | 97,3                     | 97,4             | 98,3             | 98,6             | 98,1             | 98,4                   | 99,4             | 98,9             | 99,5             | 99,5             |
| MT780557.1                     | HUBA7             | Hungary: Keszthely-BA | 97,7                     | 97,8             | 98,7             | 99               | 98,5             | 98,4                   | 99,4             | 98,9             | 99,5             | 99,5             |
| MT780556.1                     | HUBA6             | Hungary: Keszthely-BA | 97,1                     | 97,2             | 98,1             | 98,5             | 97,9             | 98,4                   | 99,4             | 98,9             | 99,5             | 99,5             |
| MT780555.1                     | HUBA5             | Hungary: Keszthely-BA | 97,3                     | 97,4             | 98,3             | 98,6             | 98,1             | 98,4                   | 99,4             | 98,9             | 99,5             | 99,5             |
| MT780554.1                     | HUBA4             | Hungary: Keszthely-BA | 97,5                     | 97,6             | 98,5             | 98,8             | 98,3             | 98,4                   | 99,4             | 98,9             | 99,5             | 99,5             |
| MT780553.1                     | HUBA3             | Hungary: Keszthely-BA | 96,5                     | 96,6             | 97,5             | 97,9             | 97,3             | 97,3                   | 98,3             | 97,9             | 98,4             | 98,4             |
| MT780552.1                     | HUBA2             | Hungary: Keszthely-BA | 97,3                     | 97,4             | 98,3             | 98,6             | 98,1             | 98,4                   | 99,4             | 98,9             | 99,5             | 99,5             |
| MT461302.1                     | 120-19            | Serbia                | 97,7                     | 98               | 98,7             | 99               | 98,5             | 97,9                   | 99,4             | 98,4             | 98,9             | 98,9             |

|            |              |                               |      |      |      |      |      |      |      |      |      |      |
|------------|--------------|-------------------------------|------|------|------|------|------|------|------|------|------|------|
| MT461301.1 | 102-19       | Serbia                        | 96,9 | 97   | 97,9 | 98,3 | 97,7 | 98,4 | 99,4 | 98,9 | 99,5 | 99,5 |
| MT461300.1 | 99-19        | Serbia                        | 97,5 | 98,2 | 98,5 | 98,8 | 98,3 | 97,9 | 99,4 | 98,4 | 98,9 | 98,9 |
| MT461299.1 | 98-19        | Serbia                        | 97,9 | 98   | 98,8 | 99,2 | 98,7 | 98,4 | 99,4 | 98,9 | 99,5 | 99,5 |
| MT260879.1 | HUBA1        | Hungary: Keszthely-BA         | 97,5 | 97,6 | 98,5 | 98,8 | 98,3 | 98,4 | 99,4 | 98,9 | 99,5 | 99,5 |
| MN901893.1 | Jbajgah      | Iran: Fars: Bajagh            | 96,3 | 96   | 96,9 | 97,3 | 96,7 | 98,4 | 99,4 | 98,9 | 99,5 | 99,5 |
| MN901892.1 | Qazvin       | Iran: Qazvin, Qazvin          | 91,7 | 91,4 | 92,3 | 92,5 | 92,3 | 98,4 | 99,4 | 98,9 | 99,5 | 99,5 |
| MN901891.1 | Zanjan       | Iran: Zanjan, Zanjan          | 92,7 | 92,6 | 93,4 | 93,6 | 93,4 | 98,4 | 99,4 | 98,9 | 99,5 | 99,5 |
| MN901890.1 | Zan132       | Iran: Zanjan, Zanjan          | 93,6 | 93,5 | 93,8 | 94,2 | 94   | 98,4 | 99,4 | 98,9 | 99,5 | 99,5 |
| MN901889.1 | Kab52        | Iran: Isfahan: Kabootarabad   | 93,4 | 93,4 | 94,2 | 94,6 | 94,4 | 98,4 | 99,4 | 98,9 | 99,5 | 99,5 |
| MN901888.1 | Azna         | Iran: Lorestan: Azna          | 93,8 | 93,9 | 94,6 | 95,1 | 94,8 | 98,4 | 99,4 | 98,9 | 99,5 | 99,5 |
| MN901887.1 | Abargoo      | Iran: Yazd, Abargoo           | 93,2 | 93,2 | 94   | 94,4 | 94,2 | 97,9 | 98,9 | 98,4 | 98,9 | 98,9 |
| MN901886.1 | Isfahan      | Iran: Isfahan, Isfahan        | 93   | 92,8 | 93,6 | 93,8 | 93,6 | 97,3 | 98,3 | 97,9 | 98,4 | 98,4 |
| MN901885.1 | FASAW        | Iran: Fars, Fasa              | 93,2 | 93,7 | 93,6 | 94   | 93,8 | 98,4 | 99,4 | 98,9 | 99,5 | 99,5 |
| MN901884.1 | Sedeh        | Iran: Fars, Sedeh             | 92,5 | 93   | 93,4 | 93,8 | 93,6 | 98,4 | 99,4 | 98,9 | 99,5 | 99,5 |
| MN901883.1 | ShahrK       | Iran: Chaharmahal, Shahrekord | 92,8 | 93,2 | 93,6 | 94   | 93,8 | 97,9 | 98,9 | 98,4 | 98,9 | 98,9 |
| MK975887.1 | WSMV-OH1     | USA: Ohio                     | 89   | 89   | 89,7 | 89,9 | 89,2 | 96,2 | 97,2 | 96,8 | 97,3 | 97,3 |
| MH939146.1 | -Sosn        | Poland: Sosnowice             | 97,9 | 98   | 98,8 | 99,2 | 98,7 | 98,4 | 99,4 | 98,9 | 99,5 | 99,5 |
| MH939145.1 | -Sze         | Poland: Szelejewo             | 97,1 | 97,2 | 98,1 | 98,5 | 97,9 | 98,4 | 99,4 | 98,9 | 99,5 | 99,5 |
| LN624217.1 | Austria      | Austria                       | 97,1 | 97,4 | 98,1 | 98,5 | 97,9 | 97,3 | 98,3 | 97,9 | 98,4 | 98,4 |
| KY419574.1 | pp2          | Czech Republic                | 84,4 | 84,7 | 85,5 | 86   | 85,5 | 78   | 78   | 78,1 | 78,7 | 78,6 |
| KY419573.1 | pp1          | Czech Republic                | 84,4 | 84,7 | 85,5 | 86   | 85,5 | 78   | 77,9 | 78   | 78,7 | 78,6 |
| KY419572.1 | ar1          | Czech Republic                | 84,6 | 85   | 85,8 | 86,2 | 85,8 | 78,6 | 78,6 | 78,7 | 79,3 | 79,3 |
| KY419571.1 | Bodycek      | Czech Republic                | 97,3 | 97,4 | 98,3 | 98,7 | 98,1 | 97,8 | 98,9 | 98,4 | 98,9 | 98,9 |
| KY419570.1 | Avenue       | Czech Republic                | 97,1 | 97,2 | 98,1 | 98,5 | 97,9 | 96,8 | 97,8 | 97,3 | 97,9 | 97,8 |
| KY419569.1 | Hymack       | Czech Republic                | 98,1 | 98,2 | 99   | 99,4 | 98,8 | 98,4 | 99,4 | 98,9 | 99,5 | 99,5 |
| KY419568.1 | Turondot     | Czech Republic                | 98,1 | 98,2 | 99   | 99,4 | 98,8 | 98,4 | 99,4 | 98,9 | 99,5 | 99,5 |
| KP261825.1 | WSMV-Sz      | Poland: Szelejewo             | 97,3 | 97,4 | 98,1 | 98,3 | 97,7 | 97,3 | 98,3 | 97,9 | 98,4 | 98,4 |
| KJ720819.1 | WSMV-1313    | Lithuania                     | 97,5 | 97,6 | 98,1 | 98,5 | 97,9 | 97,9 | 98,9 | 98,4 | 98,9 | 98,9 |
| KC900901.1 | TR           | Turkey                        | 96,9 | 97   | 97,9 | 98,3 | 97,3 | 98,9 | 98,9 | 99,5 | 100  | 98,9 |
| HG810954.1 | Hoym         | Germany                       | 97,5 | 97,6 | 98,5 | 98,8 | 98,3 | 98,4 | 99,4 | 98,9 | 99,5 | 99,5 |
| HG810953.1 | Marmagne     | France                        | 97,9 | 98   | 99   | 99,2 | 98,7 | 98,4 | 99,4 | 98,9 | 99,5 | 99,5 |
| FJ613359.1 | SK512        | Slovakia                      | 97,9 | 98   | 98,8 | 99,2 | 98,7 | 97,9 | 98,9 | 98,4 | 98,9 | 98,9 |
| FJ606886.1 | Turkei       | Turkey                        | 97,3 | 97,4 | 98,3 | 98,7 | 98,1 | 98,4 | 99,4 | 98,9 | 99,5 | 99,5 |
| FJ606885.1 | Toskana      | Italy                         | 98,1 | 98,2 | 99,2 | 99,4 | 98,8 | 98,4 | 99,4 | 98,9 | 99,5 | 99,5 |
| FJ606884.1 | Burgund      | France                        | 97,9 | 98   | 98,7 | 98,8 | 98,3 | 98,4 | 99,4 | 98,9 | 99,5 | 99,5 |
| FJ216414.1 | SlastJR      | Czech Republic                | 97,3 | 97,4 | 98,3 | 98,7 | 98,1 | 97,9 | 98,9 | 98,4 | 98,9 | 98,9 |
| FJ216412.1 | Policko-CRI  | Czech Republic                | 97,9 | 98   | 98,8 | 99,2 | 98,7 | 98,4 | 99,4 | 98,9 | 99,5 | 99,5 |
| FJ216410.1 | PoleR        | Czech Republic                | 97,7 | 97,8 | 98,7 | 99   | 98,5 | 98,4 | 99,4 | 98,9 | 99,5 | 99,5 |
| FJ216409.1 | KosHJR       | Czech Republic                | 98,1 | 98,2 | 99   | 99,4 | 98,8 | 98,4 | 99,4 | 98,9 | 99,5 | 99,5 |
| FJ216408.1 | WSMVcz1      | Czech Republic                | 97,5 | 97,6 | 98,5 | 98,8 | 98,3 | 97,9 | 98,9 | 98,4 | 98,9 | 98,9 |
| EU914918.1 | Saadat-Shahr | Iran                          | 92,1 | 92,6 | 93,2 | 93,4 | 93,2 | 98,4 | 99,4 | 98,9 | 99,5 | 99,5 |
| EU723086.1 | SK350        | Slovakia                      | 97,5 | 97,6 | 98,5 | 98,8 | 98,3 | 98,4 | 99,4 | 98,9 | 99,5 | 99,5 |
| EU723085.1 | SK349        | Slovakia                      | 98,1 | 97,8 | 98,7 | 99   | 98,8 | 98,4 | 99,4 | 98,9 | 99,5 | 99,5 |
| AF454459.1 | Russia       | Russia                        | 97,9 | 98   | 98,8 | 99,2 | 98,7 | 98,4 | 99,4 | 98,9 | 99,5 | 99,5 |
| AJ889242.1 | Ger          | Germany                       | 89,3 | 88,3 | 89,9 | 90,2 | 89   | 97,3 | 96,1 | 96,8 | 97,3 | 96,2 |
| AF454458.1 | Iran         | Iran                          | 88,8 | 88,1 | 89,5 | 89,7 | 89   | 97,3 | 98,3 | 97,9 | 98,4 | 98,4 |
| AF285170.1 | El Batan 3   | Mexico                        | 68,8 | 69,5 | 69,1 | 69,7 | 68,8 | 81   | 81,1 | 81,7 | 82,3 | 81,6 |
| AF454456.1 | Hungary      | Hungary                       | 97,3 | 97   | 98,3 | 98,7 | 97,7 | 97,9 | 98,3 | 98,4 | 98,9 | 98,4 |
| AF454454.1 | Czech        | Czech Republic                | 97,7 | 97,8 | 98,7 | 99   | 98,5 | 98,4 | 99,4 | 98,9 | 99,5 | 99,5 |

**Table S3.** Nucleotide and amino acid identity of HPWMoV isolates described in this research (shown in **bold**) with other HPWMoV isolates.

| GenBank<br>Accession<br>number | Isolate name        | Country of origin                   | Nucleic acid identity, % |              |             | Amino acid identity, % |              |             |
|--------------------------------|---------------------|-------------------------------------|--------------------------|--------------|-------------|------------------------|--------------|-------------|
|                                |                     |                                     | UA-HPWMoV-ZP             | UA-HPWMoV-DP | UA-HPWMoV-I | UA-HPWMoV-ZP           | UA-HPWMoV-DP | UA-HPWMoV-I |
| <b>MK790263.1</b>              | <b>UA-HPWMoV-ZP</b> | <b>Ukraine</b>                      | -                        | -            | -           | -                      | -            | -           |
| <b>MK790262.1</b>              | <b>UA-HPWMoV-DP</b> | <b>Ukraine</b>                      | <b>98,33</b>             | -            | -           | <b>95,9</b>            | -            | -           |
| <b>MK156130.1</b>              | <b>UA-HPWMoV-I</b>  | <b>Ukraine</b>                      | <b>85,32</b>             | <b>86,55</b> | -           | <b>75,5</b>            | <b>76,64</b> | -           |
| U60141.1                       |                     |                                     | 84,41                    | 86,05        | 76          | 84,7                   | 87,94        | 72,8        |
| MW990205.1                     | RA02 19 B           | USA: Rawlins Co KS                  | 82,74                    | 84,41        | 75,3        | 83,4                   | 86,7         | 70,76       |
| MW990204.1                     | RA02 19 A           | USA: Rawlins Co KS                  | 82,36                    | 84,04        | 74,6        | 84,5                   | 87,79        | 70,76       |
| MT762122.1                     | COPhil              | USA: Phillips Co CO                 | 66,02                    | 66,11        | 63,8        | 56,1                   | 57,04        | 48,88       |
| MT762121.1                     | COPhil              | USA: Phillips Co CO                 | 69,05                    | 69,14        | 62,9        | 63,2                   | 64,07        | 58,13       |
| MT762120.1                     | COPhil              | USA: Phillips Co CO                 | 88,53                    | 90,07        | 80,1        | 88,1                   | 91,3         | 74,49       |
| MT563400.1                     | HPWMoV 19           | USA: Phillips Co CO                 | 80,43                    | 83,81        | 83,1        | 87,1                   | 91,13        | 90,64       |
| MT027518.1                     | WMoVfield           | USA                                 | 83,75                    | 85,23        | 76          | 84,9                   | 87,36        | 72,8        |
| MT027517.1                     | WMoVseed            | USA                                 | 85,5                     | 86,68        | 74,8        | 84,7                   | 87,77        | 66,68       |
| MT027516.1                     | WMoVgrow-out        | USA                                 | 83,46                    | 84,97        | 76          | 84,7                   | 87,2         | 72,8        |
| MN315262.1                     | HPWMoV MI           | USA: Idaho                          | 83,64                    | 85,29        | 77,4        | 85,7                   | 88,93        | 72,8        |
| MN315261.1                     | HPWMoV ID           | USA: Michigan                       | 82,67                    | 84,35        | 73,8        | 83,5                   | 86,74        | 70,51       |
| MN250347.1                     | HPVWMoV NW2         | USA: Ohio Northwest<br>OARDC Branch | 88,12                    | 89,67        | 80,1        | 86,9                   | 90,12        | 74,49       |
| MN250339.1                     | HPVWMoV NW1<br>P3A  | USA: Ohio Northwest<br>OARDC Branch | 81,89                    | 83,58        | 74,5        | 84,5                   | 87,73        | 70,51       |
| KX912695.1                     | Balcarce            | Argentina                           | 83,81                    | 85,52        | 76,7        | 84,1                   | 87,43        | 72,8        |
| KX912694.1                     | Manfredi            | Argentina                           | 83,56                    | 85,29        | 76,7        | 84                     | 87,39        | 72,8        |
| KX912693.1                     | Tres Arroyos        | Argentina                           | 83,87                    | 85,57        | 76,7        | 84,2                   | 87,5         | 72,8        |
| KX912692.1                     | Otamendi            | Argentina                           | 83,49                    | 85,23        | 76,7        | 84                     | 87,39        | 72,8        |
| KX912691.1                     | Necochea            | Argentina                           | 83,75                    | 85,46        | 76,7        | 84,1                   | 87,43        | 72,8        |
| KT995102.1                     | H1 K1 W1 pool       | USA: Ohio                           | 88,91                    | 90,44        | 80,1        | 86,9                   | 90,12        | 74,49       |
| KT988889.1                     | K1                  | USA: Ohio                           | 88,52                    | 90,06        | 80,1        | 86,9                   | 90,12        | 74,49       |
| KT988882.1                     | H1 1501             | USA: Ohio                           | 89,31                    | 90,83        | 80,8        | 86,9                   | 90,12        | 74,49       |
| KT988881.1                     | H1                  | USA: Ohio                           | 89,31                    | 90,83        | 80,8        | 86,9                   | 90,12        | 74,49       |
| KT988872.1                     | GG1 3B              | USA: Ohio                           | 84,41                    | 86,05        | 76          | 84,7                   | 87,94        | 72,8        |
| KT988871.1                     | GG1 3A              | USA: Ohio                           | 83,89                    | 85,55        | 76,3        | 85,3                   | 88,62        | 71,46       |
| KT988863.1                     | KS7 3B              | USA: Kansas                         | 84,41                    | 86,05        | 76          | 84,7                   | 87,94        | 72,8        |
| KT988862.1                     | KS7 3A              | USA: Kansas                         | 81,89                    | 83,58        | 74,5        | 84,5                   | 87,73        | 70,51       |
| KT970501.1                     | W1                  | USA: Ohio                           | 88,91                    | 90,44        | 80,1        | 86,9                   | 90,12        | 74,49       |
| KT013206.1                     | 09WYPT26            | Australia: NSW                      | 82,69                    | 84,48        | 75,3        | 83,7                   | 87,1         | 72,8        |
| KJ939626.1                     | Nebraska 3B         | USA                                 | 83,98                    | 85,63        | 75,3        | 83,5                   | 86,78        | 70,64       |
| KJ939625.1                     | Nebraska 3A         | USA                                 | 81,89                    | 83,58        | 74,5        | 84,5                   | 87,73        | 70,51       |
| KF031532.1                     |                     | USA                                 | 82,77                    | 84,52        | 74,6        | 84,1                   | 87,43        | 72,8        |
| KC337341.1                     | WA-CG12             | Australia: Corrigin WA              | 83,16                    | 84,94        | 76          | 83,7                   | 87,1         | 72,8        |
| DQ324466.1                     |                     | USA                                 | 88,14                    | 89,68        | 80,8        | 86,9                   | 90,12        | 74,49       |
| AY836525.1                     | C                   | USA                                 | 82,72                    | 84,52        | 76          | 82,5                   | 85,91        | 72,8        |
| AY836524.1                     | A                   | USA                                 | 83,62                    | 85,39        | 76,7        | 83,7                   | 87,1         | 72,8        |
